# Supplementary material
Source: Springer Nature journal article supplement (https://www.springerprofessional.de/resource/supplementary/13638_2012_776_MOESM1_ESM.pdf/11898326)

# Coordinator

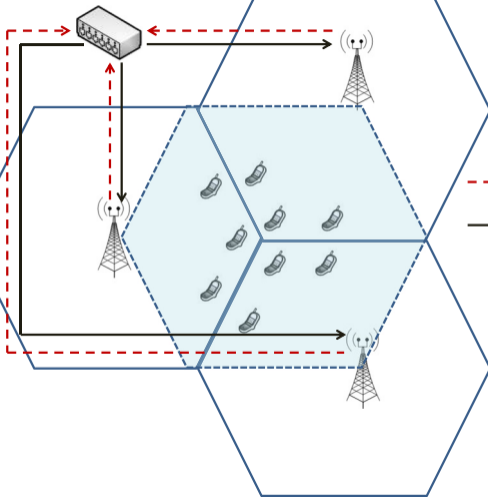

- - - - -> Channel state information

—————> Indices of selected users  
and precoding matrices

Supplement: MOESM1 [file 11898326]
